# Supplementary material for: MoS2/CQDs obtained by photoreduction for assembly of a ternary MoS2/CQDs/ZnIn2S4 nanocomposite for efficient photocatalytic hydrogen evolution under visible light
Source: Royal Society of Chemistry journal article supplement (doi:10.1039/c8ta07797e), 2018-01-01

**Electronic Supporting Information**

**Photoreduction Obtained MoS<sub>2</sub>/CQDs for Assembly of Ternary MoS<sub>2</sub>/CQDs/ZnIn<sub>2</sub>S<sub>4</sub> Nanocomposite for Efficient Photocatalytic Hydrogen Evolution under Visible Light**

Bingqing Wang, Zirong Deng, Xianzhi Fu and Zhaohui Li\*

*Research Institute of Photocatalysis, State Key Laboratory of Photocatalysis on Energy and Environment, College of Chemistry, Fuzhou University, Fuzhou 350116, P. R. China*

---

\* Author to whom all correspondences should be addressed.

E-mail: [zhaohuili1969@yahoo.com](mailto:zhaohuili1969@yahoo.com); Tel (Fax): 86-591-22865855

**Fig. S1** CV of  $(\text{NH}_4)_2\text{MoS}_4$ .

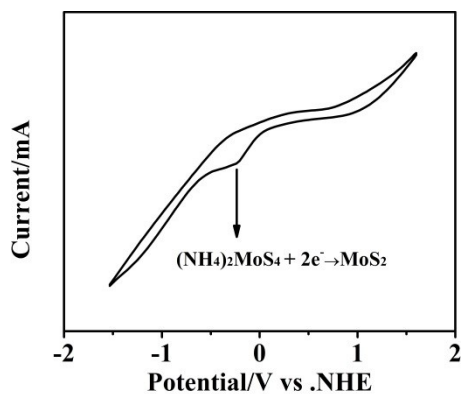

Cyclic Voltammetry curve of  $(\text{NH}_4)_2\text{MoS}_4$  was measured on an electrochemical analyzer (Zahner, Germany) in a standard three-electrode system using the glassy carbon electrode as the working electrodes, Pt wire as the counter electrode, and Ag/AgCl (saturated KCl) as a reference electrode.

**Fig. S2** UV–vis spectra of the precursor solution containing CQDs and  $(\text{NH}_4)_2\text{MoS}_4$  before and after irradiation.

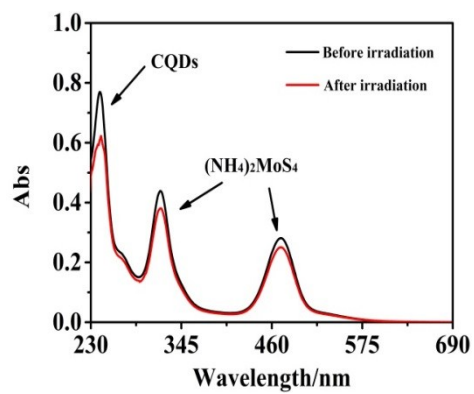

**Fig. S3** SEM image of bare  $\text{ZnIn}_2\text{S}_4$

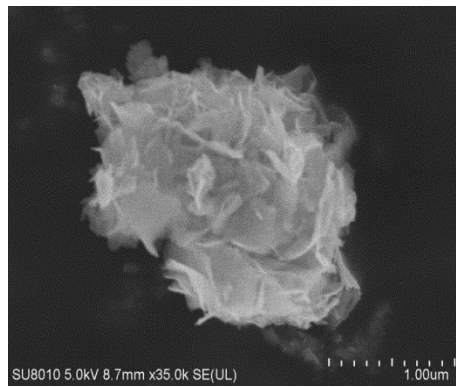

**Fig. S4** Element mapping images of 3.0 wt% MoS<sub>2</sub>/CQDs/ZnIn<sub>2</sub>S<sub>4</sub> nanocomposite.

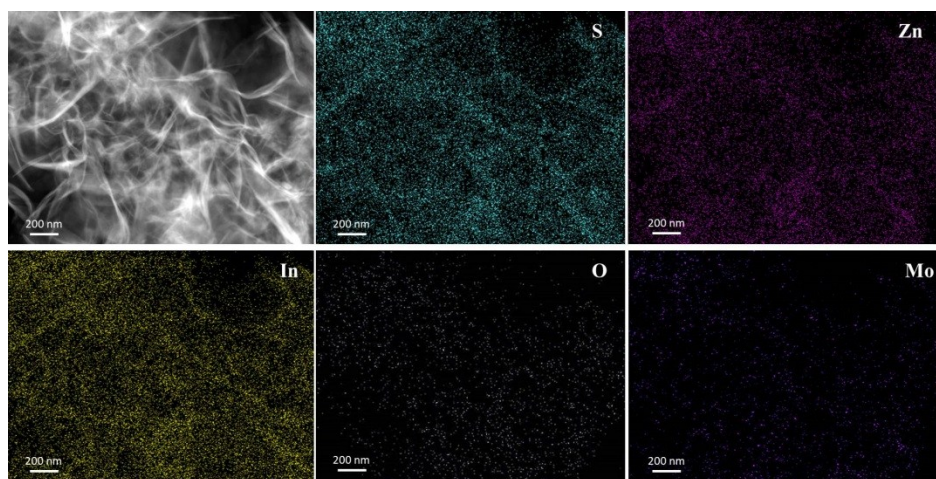

**Fig. S5** XRD patterns of 3.0 wt% MoS<sub>2</sub>/CQDs/ZnIn<sub>2</sub>S<sub>4</sub> nanocomposite before and after photocatalytic reaction.

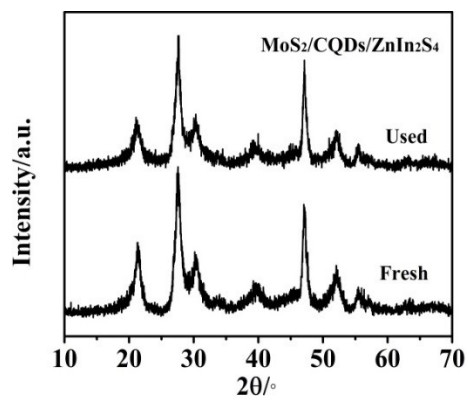

**Fig. S6** XPS spectra of 3.0 wt% MoS<sub>2</sub>/CQDs/ZnIn<sub>2</sub>S<sub>4</sub> nanocomposite in C 1s, O 1s and Mo 3d after photocatalytic reaction.

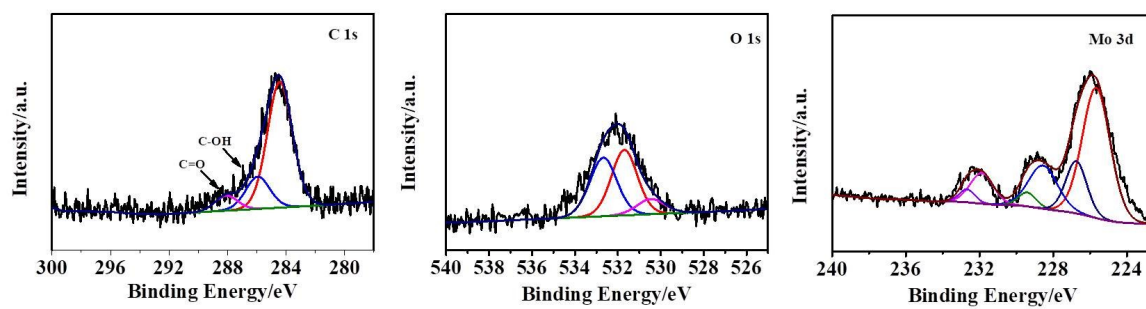

Supplement: c8ta07797e1.pdf [file c8ta07797e1.pdf]
